# Supplementary material
Source: PubMed Central journal article supplement (PMC3799197)
Supplement: tlo0605_0546SD1.pdf [file tlo0605_0546SD1.pdf]

**Table W1.** Clinical Data from the Two Patient Cohorts.

|                    | Series 1 | Series 2 | Combined |
|--------------------|----------|----------|----------|
| No. of patients    | 92       | 14       | 106      |
| Age                |          |          |          |
| Mean               | 65.3     | 75.4     | 66.6     |
| Gender             |          |          |          |
| Women              | 51       | 5        | 56       |
| Men                | 41       | 9        | 50       |
| Tumor localization |          |          |          |
| Colon              | 54       | 14       |          |
| Rectum             | 38       |          |          |
| T stage            |          |          |          |
| T2                 | 50       | 2        | 52       |
| T3                 | 42       | 11       | 53       |
| T4                 | 0        | 1        | 1        |
| MSI status         |          |          |          |
| MSI                | 14       | 6        | 20       |
| MSS                | 77       | 8        | 85       |
| NA                 | 1        | 0        | 1        |

A total of 106 patients, from two cohorts, were used in validating the fusions. The cohorts were enriched for patients with stage II or stage III CRC.

**Table W2.** Number of Paired RNA Sequence Reads that Passed the Illumina Chastity Filtering and the Number of Reads that Aligned to the Reference Genome hg19, Using TopHat v1.3.3 and Bowtie 0.12.7, for Each of the Seven Cell Lines on the Illumina Genome Analyzer Iix Instrument.

| Cell Line | Filtered Clusters (M) | Reads Aligned (M) |
|-----------|-----------------------|-------------------|
| HT29      | 33.9                  | 61.3              |
| HCT15     | 31.3                  | 43.8              |
| SW480     | 33.5                  | 54.6              |
| SW48      | 23.4                  | 32.6              |
| HCT116    | 32.1                  | 46.8              |
| LS1034    | 31.4                  | 34.1              |
| RKO       | 37.6                  | 61.7              |

**Table W3.** Oligonucleotide Primers Used in RT-PCR to Validate the Fusion Transcripts.

| Fusion Transcript                | Cell Line with Indication from RNA Sequence Data | Forward Primer       | Reverse Primer           |
|----------------------------------|--------------------------------------------------|----------------------|--------------------------|
| <i>MGRN1-C16orf96</i>            | HCT15                                            | TGCAGGACTTGCTCACTGAT | GCTGCAGTGCAACCATCTT      |
| <i>NCOA3-SPINT1</i>              | HCT15                                            | TAAAGCTGAGCTGCGAGGAA | GTGCACAGAAGCCACAAGG      |
| <i>PRMT1-FLT3LG</i>              | HCT15                                            | TACCGTCAAGGTGGAAGACC | GAAGTTCTGGCGAGTGATCC     |
| <i>COMMD10-AP3S1</i>             | HCT116                                           | CAGCTTTGCAGCAGCAATTA | TGTGCATCAATTTGTGTAACAATC |
| <i>COMMD10-AP3S1*</i>            | HCT116                                           | CAAAGCTGAAGCATTTGTCA | CCCATCACCAATTTCTGCAAG    |
| <i>COMMD10-AP3S1<sup>†</sup></i> | HCT116                                           | GCCACCCAGTTTTATGCTTG | GCAAGACCAAGAGGTTTTGATG   |
| <i>SPAG9-MBTD1</i>               | HCT116                                           | GTGCTGGAGAACCTGGACTC | CCATTCCCCTCTGGTCTA       |
| <i>SLC39A14-TSPAN15</i>          | HT29                                             | CTGCCTGGACCTCCTCTTTC | GGACTACCGAGATTGGAGCA     |
| <i>AKAP13-PDE8A</i>              | SW480                                            | GCGAAGGTGAAGAGTTGTCC | AACCCCTGCTTTTTACATGC     |
| <i>AKAP13-PDE8A*</i>             | SW480                                            | TGTGCTCTGCCGAGACTG   | AGCCTGAGCCTCCTGGTA       |
| <i>CTB-35F21.1-PSD2</i>          | SW480                                            | AGAGCTCCTCACCTGTTCCA | TCCTCAGGCACTGCAGATAA     |
| <i>CTB-35F21.1-PSD2*</i>         | SW480                                            | GTGTCTCCTGAGCCCACTCC | TCACTGGCCATCCCATTTC      |
| <i>FAM96A-STIM1</i>              | SW480                                            | CTGGAAGTGGTCTCGAAAG  | TCAGCCACTGTACCACCTCA     |
| <i>GRIN2B-CYP4F3</i>             | SW480                                            | ATTCCCAACATGCTCACTCC | GCATCACTCTGGGTGTCTT      |

\*Primers used in nested RT-PCR.

<sup>†</sup>Primers used for testing the genomic breakpoint.**Table W4.** By Using Five Filtering Steps, the Number of Candidate Fusions was Reduced from 3391 to 11.

| Sample                                                                                                     | Unfiltered Fusions | Normal | Ribosomal | Promiscuous | Intrachromosomal <100 kb | Not Exon Boundaries |
|------------------------------------------------------------------------------------------------------------|--------------------|--------|-----------|-------------|--------------------------|---------------------|
| (A) The number of potential fusions in the sequenced cell lines, before and after the five filtering steps |                    |        |           |             |                          |                     |
| RKO                                                                                                        | 999                | 880    | 397       | 45          | 40                       | 1                   |
| HCT15                                                                                                      | 705                | 586    | 358       | 36          | 27                       | 1                   |
| HCT116                                                                                                     | 693                | 545    | 207       | 41          | 31                       | 2                   |
| SW480                                                                                                      | 506                | 406    | 220       | 43          | 37                       | 6                   |
| LS1034                                                                                                     | 381                | 293    | 128       | 31          | 26                       | 0                   |
| HT29                                                                                                       | 75                 | 34     | 15        | 14          | 10                       | 1                   |
| SW48                                                                                                       | 32                 | 3      | 2         | 2           | 2                        | 0                   |
| All                                                                                                        | 3391               | 2747   | 1328      | 212         | 173                      | 11                  |
| (B) The number of potential fusions in the sequenced cell lines applying each filter separately            |                    |        |           |             |                          |                     |
| RKO                                                                                                        | 999                | 880    | 418       | 72          | 897                      | 96                  |
| HCT15                                                                                                      | 705                | 586    | 390       | 71          | 635                      | 75                  |
| HCT116                                                                                                     | 693                | 545    | 228       | 59          | 586                      | 79                  |
| SW480                                                                                                      | 506                | 406    | 235       | 136         | 433                      | 64                  |
| LS1034                                                                                                     | 381                | 293    | 137       | 55          | 332                      | 42                  |
| HT29                                                                                                       | 75                 | 34     | 20        | 35          | 56                       | 14                  |
| SW48                                                                                                       | 32                 | 3      | 3         | 6           | 17                       | 6                   |
| All                                                                                                        | 3391               | 2747   | 1431      | 434         | 2956                     | 376                 |

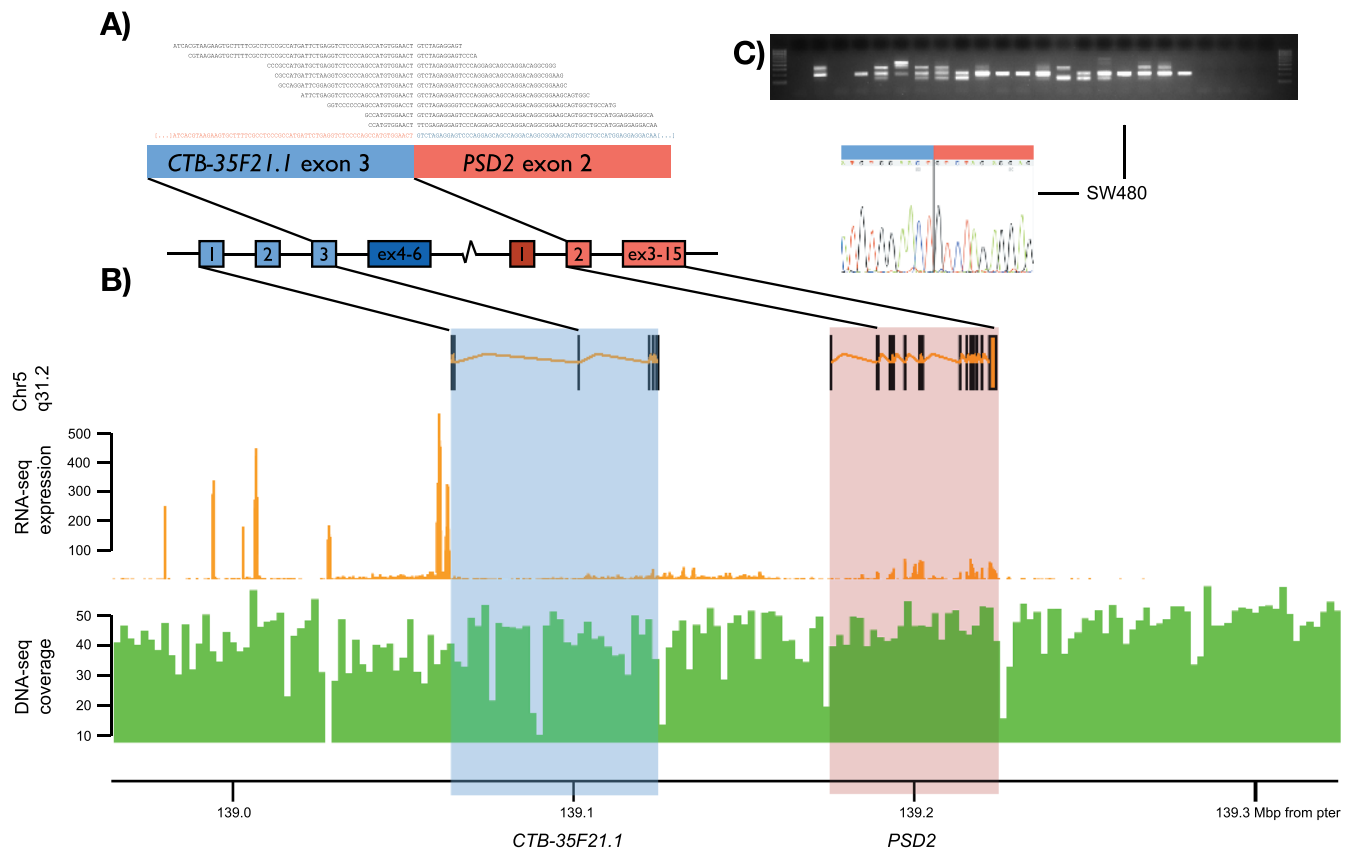

**Figure W1.** The *CTB-35F21.1-PSD2* fusion transcript is recurrent in CRC, and the genomic locus is rearranged in the SW480 cell line. (A) Nine sequence reads spanned the chimeric breakpoint, passing from exon 3 of *CTB-35F21.1* (ENST00000515296) to exon 2 of *PSD2* (ENST00000274710). Dark colors indicate exons that are not part of the fusion transcript. (B) Genomic view of the rearranged locus, from the top showing annotated exons of the fused genes (exons belonging to genes located between and within *CTB-35F21.1* and *PSD2* were removed for clarification) and relative RNA expression levels and DNA copy numbers, both based on high-throughput sequencing data from the SW480 cell line. (C) The *CTB-35F21.1-PSD2* fusion transcript was initially detected in the SW480 cell line, but nested RT-PCR demonstrated detectable levels in 17 additional colon cancer cell lines. The identity of the *CTB-35F21.1-PSD2* fusion transcript was verified by Sanger sequencing.

**Table W5.** Number of Positive Samples for Each of the 10 Experimentally Verified Fusion Transcripts.

| Fusion Transcript       | Colon Cancer Cell Lines | Clinical CRCs | Normal Colonic Mucosa |
|-------------------------|-------------------------|---------------|-----------------------|
| <i>n</i>                | 21                      | 106           | 14                    |
| <i>AKAP13-PDE8A</i>     | 18                      | 19            | 4                     |
| <i>COMMD10-AP3S1</i>    | 20                      | 61            | 4                     |
| <i>CTB-35F21.1-PSD2</i> | 18                      | 49            | 2                     |
| <i>FAM96A-STIM1</i>     | 1                       | 0             | 0                     |
| <i>GRIN2B-CYP4F3</i>    | 1                       | 0             | 0                     |
| <i>MGRN1-AC023830.2</i> | 2                       | 0             | 0                     |
| <i>SPAG9-MBTD1</i>      | 1                       | 4             | 1                     |
| <i>NCOA3-SPINT1</i>     | 2                       | 0             | 1                     |
| <i>PRMT1-FLT3LG</i>     | 2                       | 0             | 0                     |
| <i>SLC39A14-TSPAN15</i> | 1                       | 0             | 0                     |

**Table W6.** The Presence of Fusion Transcripts in the 14 Matched Tumor-Normal Samples from Series 2.

| Series 2 Pair | <i>AKAP13-PDE8A</i> |        | <i>CTB-35F21.1-PSD2</i> |        | <i>COMMD10-AP3S1</i> |        |
|---------------|---------------------|--------|-------------------------|--------|----------------------|--------|
|               | Tumor               | Normal | Tumor                   | Normal | Tumor                | Normal |
| 1             | N                   | N      | N                       | N      | Y                    | N      |
| 2             | N                   | N      | N                       | N      | Y                    | Y      |
| 3             | N                   | N      | Y                       | Y      | Y                    | N      |
| 4             | N                   | N      | Y                       | N      | Y                    | N      |
| 5             | Y                   | N      | N                       | N      | N                    | N      |
| 6             | N                   | N      | Y                       | N      | Y                    | N      |
| 7             | N                   | N      | N                       | N      | Y                    | Y      |
| 8             | N                   | N      | Y                       | N      | Y                    | N      |
| 9             | Y                   | Y      | N                       | Y      | Y                    | N      |
| 10            | N                   | N      | Y                       | N      | Y                    | Y      |
| 11            | N                   | Y      | Y                       | N      | Y                    | N      |
| 12            | N                   | N      | N                       | N      | N                    | N      |
| 13            | N                   | Y      | N                       | N      | Y                    | Y      |
| 14            | Y                   | Y      | Y                       | N      | Y                    | N      |

**Table W7.** Sequence Validation of Nested PCR Products was Performed on Altogether 36 Samples Positive for either of the Identified Fusion Transcripts.

| Fusion Transcript       | Positive Samples Confirming the Identity of Both Partner Genes |
|-------------------------|----------------------------------------------------------------|
| <i>COMMD10-AP3S1</i>    | 7/7 (100%)                                                     |
| <i>CTB-35F21.1-PSD2</i> | 6/6 (100%)                                                     |
| <i>AKAP13-PDE8A</i>     | 5/6 (83%)                                                      |
| <i>SPAG9-MBTD1</i>      | 2/4 (50%)                                                      |
| <i>NCOA3-SPINT1</i>     | 2/3 (67%)                                                      |
| <i>PRMT1-FLT3LG</i>     | 7/8 (88%)                                                      |
| <i>MGRN1-C16orf96</i>   | 2/2 (100%)                                                     |

**Table W8.** The Presence of Fusion Transcripts in 20 Normal RNA Samples.

| Sample          | <i>AKAP13-PDE8A</i> | <i>COMMD10-AP3S1</i> | <i>CTB-35F21.1-PSD2</i> |
|-----------------|---------------------|----------------------|-------------------------|
| Adipose         | N                   | N                    | Y                       |
| Bladder         | N                   | N                    | Y                       |
| Brain           | N                   | N                    | Y                       |
| Cervix          | N                   | N                    | Y                       |
| Colon           | Y                   | Y                    | Y                       |
| Esophagus       | N                   | Y                    | Y                       |
| Heart           | N                   | N                    | N                       |
| Kidney          | N                   | N                    | Y                       |
| Liver           | N                   | Y                    | Y                       |
| Lung            | Y                   | N                    | Y                       |
| Ovary           | N                   | Y                    | Y                       |
| Placenta        | N                   | Y                    | Y                       |
| Prostate        | N                   | N                    | Y                       |
| Skeletal muscle | N                   | N                    | Y                       |
| Spleen          | N                   | Y                    | Y                       |
| Stomach         | N                   | N                    | N                       |
| Testes          | Y                   | Y                    | Y                       |
| Thymus          | N                   | Y                    | Y                       |
| Thyroid         | N                   | Y                    | N                       |
| Trachea         | N                   | Y                    | Y                       |
